# Supplementary material for: Hunting for a maximum highly-energetic facet that interplays with spatial charge storage for enhanced catalytic activity
Source: Royal Society of Chemistry journal article supplement (doi:10.1039/c2cp41304c), 2012-01-01
Supplement: c2cp41304c.pdf [file c2cp41304c.pdf]

Electronic Supplementary Information (ESI) available for:

**Hunting for a maximum highly-energetic facet that interplays  
with spatial charge storage for enhanced catalytic activity**

*Jun Zhang,<sup>a,c</sup> Liping Li,<sup>b</sup> and Guangshe Li<sup>a\*</sup>*

<sup>a</sup> State Key Laboratory of Structural Chemistry, <sup>b</sup> Key Lab of Optoelectronic Materials Chemistry and Physics, Fujian Institute of Research on the Structure of Matter, Chinese Academy of Sciences,

Fuzhou 350002; <sup>c</sup> School of Chemistry and Chemical Engineering, Inner Mongolia University,

Hohhot 010021, People's Republic of China.

*Fax: (+) 86-591-83714946*

*E-mail: [guangshe@fjirsm.ac.cn](mailto:guangshe@fjirsm.ac.cn)*

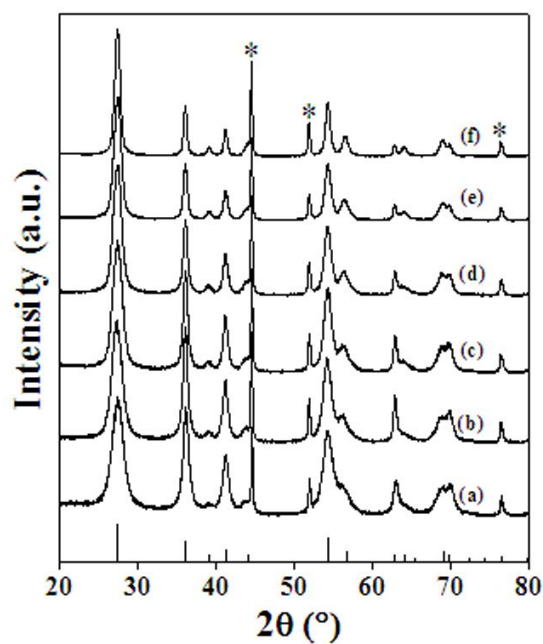

**S1** XRD patterns of the rutile  $\text{TiO}_2$  microspheres synthesized at  $160^\circ\text{C}$  for different period of reaction time: (a) 1 h, (b) 1.5 h, (c) 2 h, (d) 2.5 h (e) 4 h and (f) 8 h. Vertical bars represent the standard diffraction data of bulk rutile  $\text{TiO}_2$ . Symbol \* represents the diffraction lines of internal standard nickel.

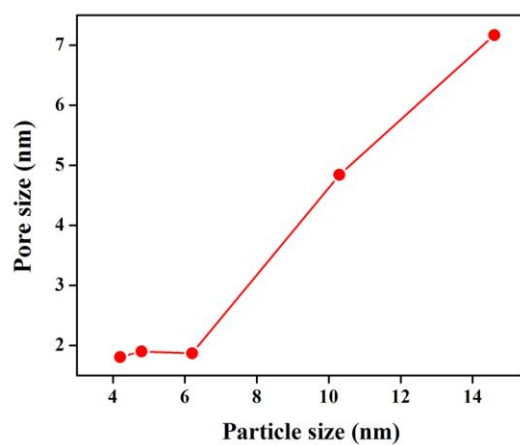

**S2** Pore size as a function of the diameters of constructing nanowires within TiO<sub>2</sub> microspheres.

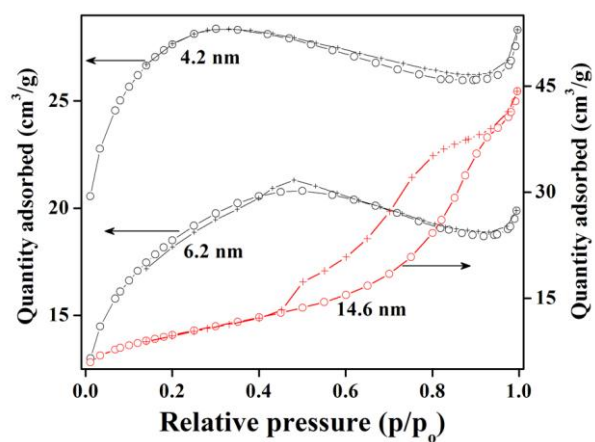

**S3** Typical nitrogen adsorption and desorption isotherm curves for different diameters of the constructing nanowires of rutile TiO<sub>2</sub> microspheres.

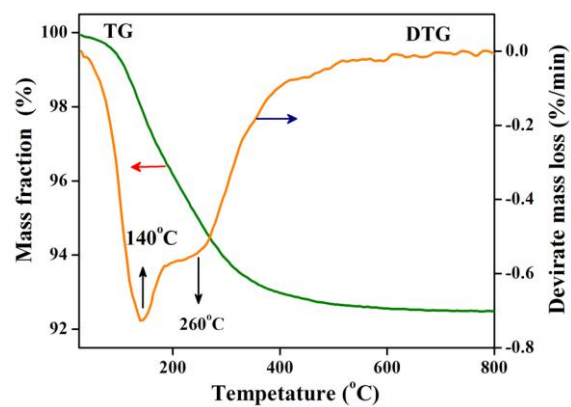

**S4** TG and DTG curve for a typical nanowires diameter of 4.2 nm for rutile TiO<sub>2</sub> microspheres.

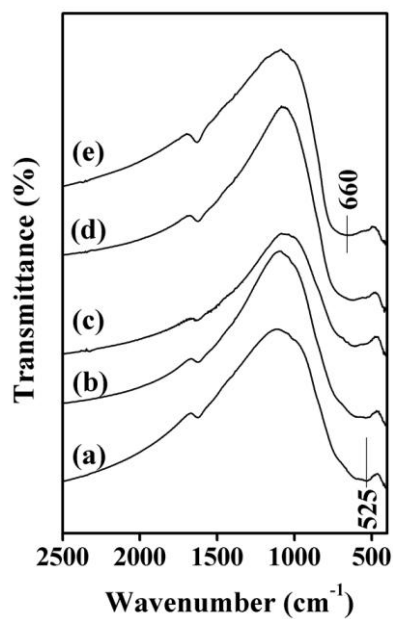

**S5** FT-IR spectra that illustrate the relative shifts of the vibration for Ti-O bonding with increasing the diameters of constructing nanowires within microspheres: (a) 4.2 nm, (b) 4.8 nm, (c) 6.2 nm, (b) 10.3 nm, and (b) 14.6 nm.

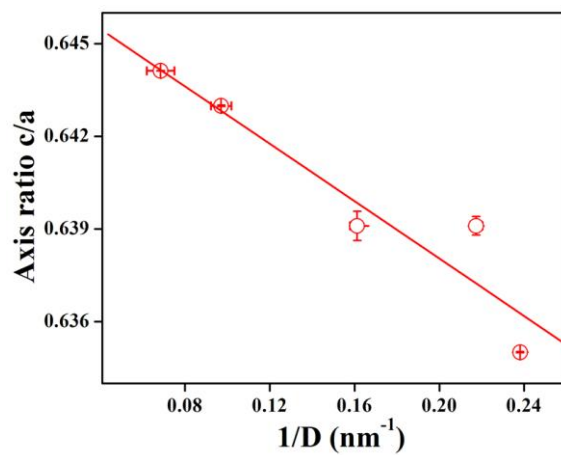

**S6** Axis ratio  $c/a$  as a function of the diameters of constructing nanowires in the assembled microspheres.

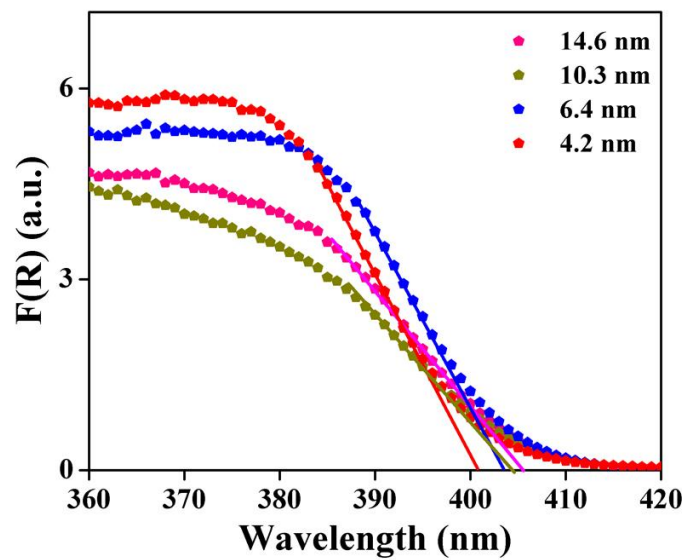

**S7** Enlarged UV-vis DRS of TiO<sub>2</sub> microspheres with different constructing nanowires.



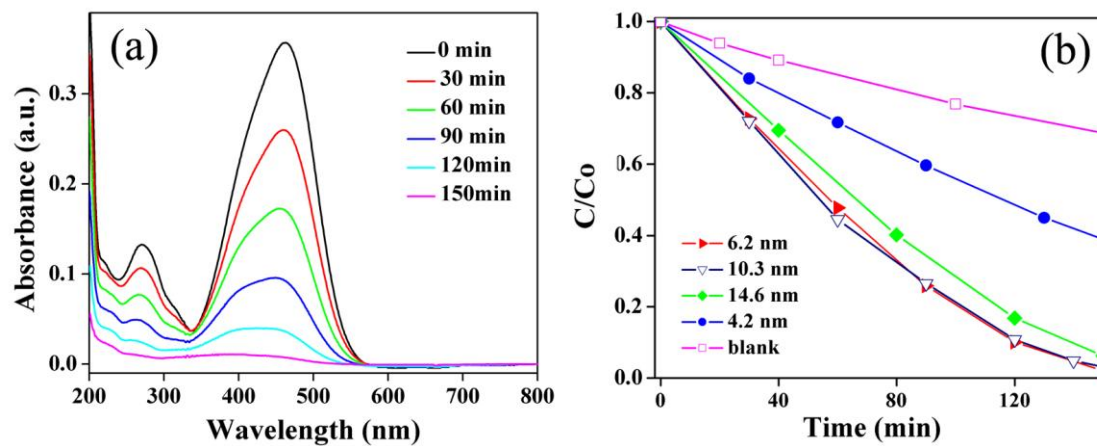

**S8** (a) Time-dependent absorption spectra of MO solution in the presence of microspheres assembled by TiO<sub>2</sub> nanowires with a diameter of 6.2 nm, and (b) photocatalytic activities when irradiated by UV light at 254 nm, as indicated by normalized concentration of methyl orange versus irradiation time in the presence of TiO<sub>2</sub> microspheres assembled by nanowires with given diameters.

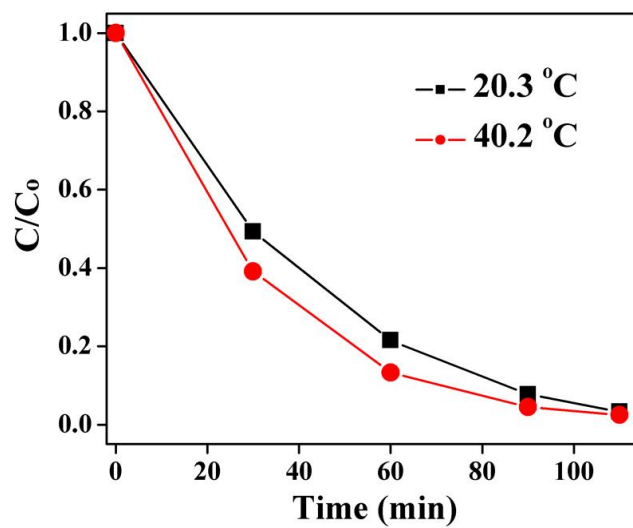

**S9** Photo-degradation curve of  $\text{TiO}_2$  microsphere with a diameter of 6.2 nm constructing nanowires under different temperature.

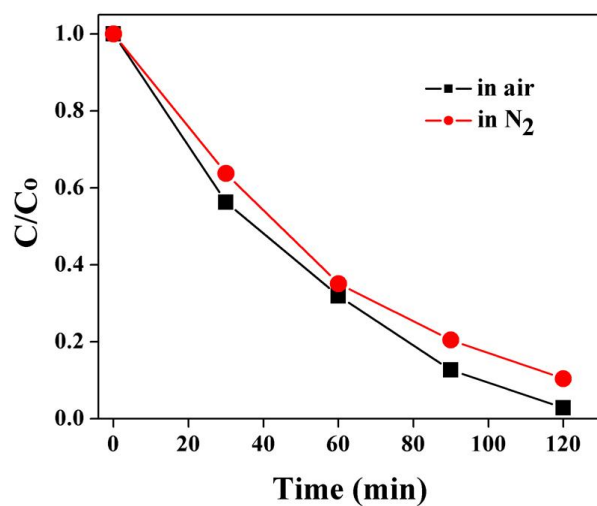

**S10** The photo degradation curves of MO in presence of TiO<sub>2</sub> microsphere with a constructing diameter of 6.2 nm irradiated by 300 nm UV-Vis light at the atmosphere of air or N<sub>2</sub>.
